# Supplementary material for: The role of π-linkers and electron acceptors in tuning the nonlinear optical properties of BODIPY-based zwitterionic molecules
Source: Royal Society of Chemistry journal article supplement (doi:10.1039/d0ra02193h), 2020-01-01
Supplement: d0ra02193h1.pdf [file d0ra02193h1.pdf]

## Electronic Supplementary Information

### The Role of $\pi$ -Linkers and Electron Acceptors in Tuning the Nonlinear Optical Properties of BODIPY Based Zwitterionic Molecules

Tanushree Sutradhar and Anirban Misra\*

Department of Chemistry, University of North Bengal, Darjeeling – 734 013, West Bengal, India

\*Phone: +91-9434228745; Email: anirbanmisra@yahoo.com; anirbanmisra@nbu.ac.in

| Item      | Description                                                                                                                                                                                      | pages |
|-----------|--------------------------------------------------------------------------------------------------------------------------------------------------------------------------------------------------|-------|
| Fig. S1   | Optimized structure of compounds 1                                                                                                                                                               | S2    |
| Table S1  | Dihedral angles and bond angles of optimized structure of compound 1                                                                                                                             | S2    |
| Fig. S2   | Optimized structure of compound 1a                                                                                                                                                               | S2    |
| Table S2  | Dihedral angles and bond angles of optimized structure of compound 1a                                                                                                                            | S3    |
| Fig. S3   | Optimized structure of compound 1b                                                                                                                                                               | S3    |
| Table S3  | Dihedral angles and bond angles of optimized structure of compound 1b                                                                                                                            | S3    |
| Fig. S4   | Optimized structure of compound 1c                                                                                                                                                               | S4    |
| Table S4  | Dihedral angles and bond angles of optimized structure of compound 1c                                                                                                                            | S4    |
| Fig. S5   | Optimized structure of compounds 1d                                                                                                                                                              | S4    |
| Table S5  | Dihedral angles and bond angles of optimized structure of compound 1d                                                                                                                            | S5    |
| Fig. S6   | Optimized structure of compounds 2                                                                                                                                                               | S5    |
| Table S6  | Dihedral angles and bond angles of optimized structure of compound 2                                                                                                                             | S5    |
| Fig. S7   | Optimized structure of compound 2a                                                                                                                                                               | S6    |
| Table S7  | Dihedral angles and bond angles of optimized structure of compound 2a                                                                                                                            | S6    |
| Fig. S8   | Optimized structure of compound 2b                                                                                                                                                               | S6    |
| Table S8  | Dihedral angles and bond angles of optimized structure of compound 2b                                                                                                                            | S6-S7 |
| Fig. S9   | Optimized structure of compound 2c                                                                                                                                                               | S7    |
| Table S9  | Dihedral angles and bond angles of optimized structure of compound 2c                                                                                                                            | S7    |
| Fig. S10  | Optimized structure of compound 2d                                                                                                                                                               | S7    |
| Table S10 | Dihedral angles and bond angles of optimized structure of compound 2d                                                                                                                            | S8    |
| Table S11 | Computed absorption maxima ( $\lambda_{\text{max}}$ in nm), oscillator strengths ( $f$ ), electronic excitation energies (eV) of dyes (1 to 2d) using TD-DFT method at B3LYP/6-311+G(d,p) level. | S8-S9 |
| Table S12 | Static polarizability, first hyperpolarizability of the studied dyes at the CAM-B3LYP/6-311++G(d,p) level of theory.                                                                             | S9    |

**Table S13**  $\beta_x$ ,  $\beta_y$ , and  $\beta_z$  components ( $10^{-30}$  esu) of studied molecules (1 to 2d) obtained from DFT calculation (CAM-B3LYP functional), employing the 6-311++G(d,p) basis Set S9

**Table S14** Benchmarking of hyperpolarizability. S10

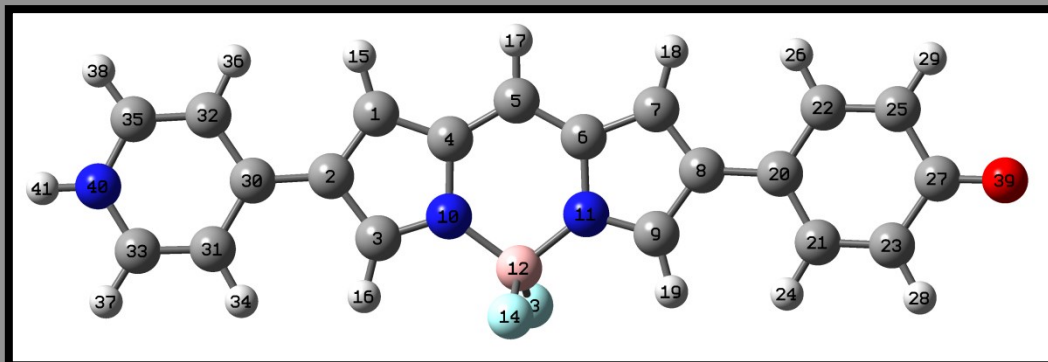

**Fig. S1** Optimized structure of compounds 1

**Table S1** Dihedral angles and bond angles of optimized structure of compound 1

| Dihedral angles |        |
|-----------------|--------|
| C32-C30-C2-C3   | -179.3 |
| C7-C8-C20-C21   | 178.28 |
| Bond angles     |        |
| C32-C30-C2      | 121.2  |
| C31-C30-C2      | 123.3  |
| C8-C20-C22      | 120.7  |
| C8-C20-C21      | 122.2  |

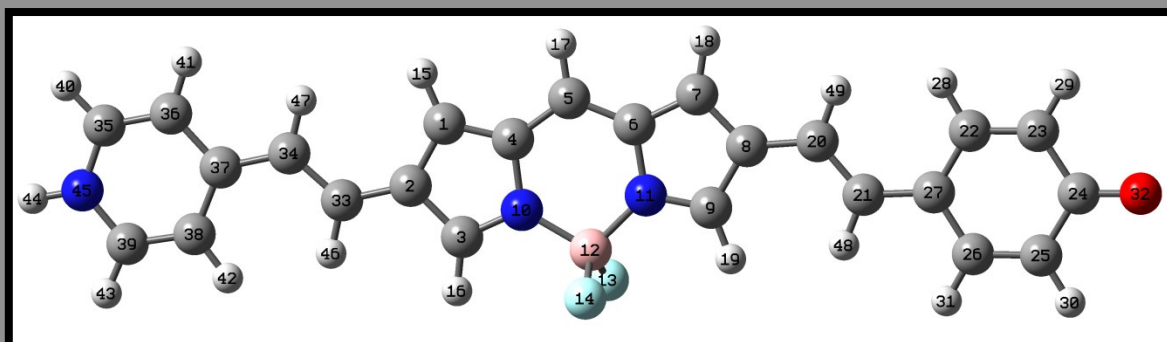

**Fig. S2** Optimized structure of compounds 1a

**Table S2** Dihedral angles and bond angles of optimized structure of compound 1a

| Dihedral angles |        |
|-----------------|--------|
| C37-C34-C33-C2  | -179.9 |
| C20-C21-C27-C26 | 179.9  |

| Bond angles |       |
|-------------|-------|
| C36-C37-C34 | 120.4 |
| C38-C37-C34 | 124.5 |
| C21-C27-C22 | 123.1 |
| C21-C27-C26 | 119.2 |

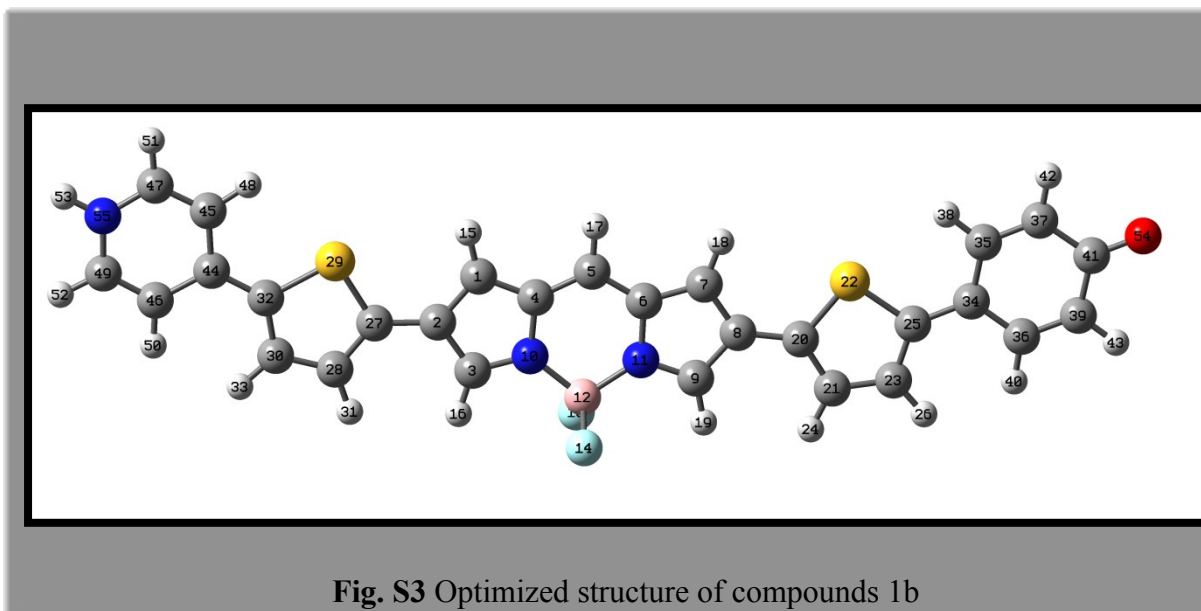

**Table S3** Dihedral angles and bond angles of optimized structure of compound 1b

| Dihedral angles |        |
|-----------------|--------|
| C45-C44-C32-C30 | -179.9 |
| C45-C44-C32-S29 | 0.002  |
| S29-C27-C2-C3   | -179.9 |
| C9-C8-C20-S22   | 179.9  |
| C23-C25-C34-C35 | 180    |
| S22-C25-C34-C35 | -0.003 |
| Bond angles     |        |
| C44-C32-S29     | 122.2  |
| C34-C25-S22     | 122    |

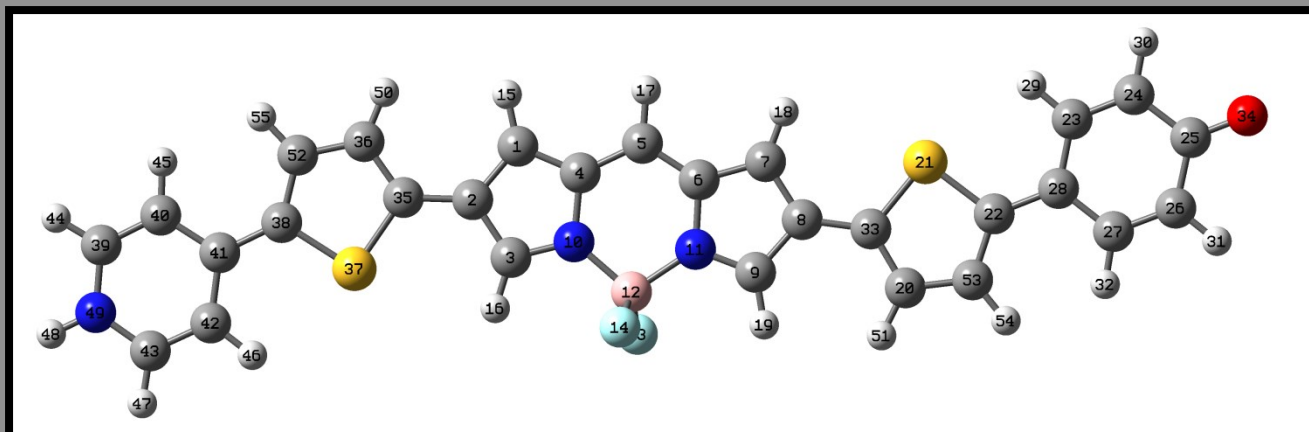

Fig. S4 Optimized structure of compounds 1c

Table S4 Dihedral angles and bond angles of optimized structure of compound 1c

| Dihedral angles |        |
|-----------------|--------|
| C42-C41-C38-C52 | 179.9  |
| C42-C41-C38-S37 | 0.001  |
| C36-C35-C2-C3   | -179.9 |
| C7-C8-C33-C20   | 180    |
| C7-C8-C33-S21   | -0.001 |
| C53-C22-C28-C23 | 180    |
| S21-C22-C28-C27 | -179.9 |
| Bond angles     |        |
| C41-C38-S37     | 122.2  |
| C28-C22-S21     | 122.1  |

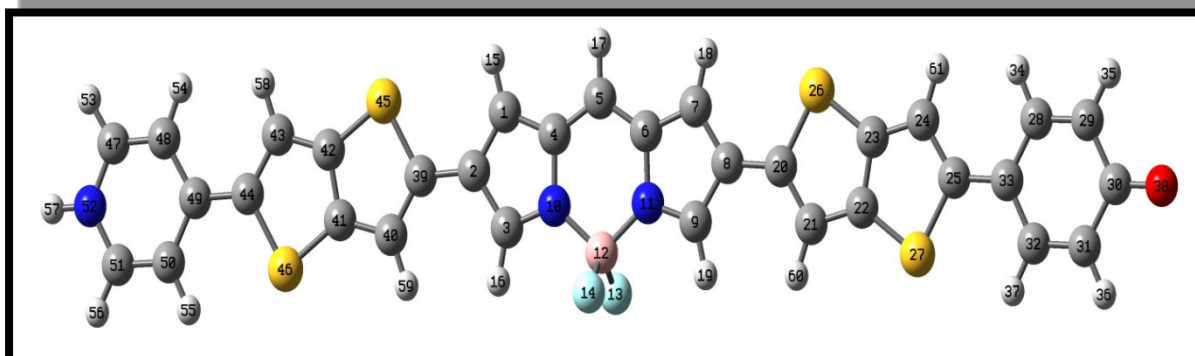

Fig. S5 Optimized structure of compounds 1d

**Table S5** Dihedral angles and bond angles of optimized structure of compound 1d

| <b>Dihedral angles</b> |        |
|------------------------|--------|
| C48-C49-C44-S46        | 179.9  |
| C40-C39-C2-C1          | -179.9 |
| S45-C39-C2-C3          | -179.9 |
| C7-C8-C20-C21          | -180   |
| C9-C8-C20-C26          | -179.9 |
| C28-C33-C25-S27        | 179.9  |
| <b>Bond angles</b>     |        |
| C49-C44-S45            | 121.3  |
| S45-C39-C2             | 120.1  |
| C8-C20-C26             | 120.3  |
| C33-C25-S27            | 121.2  |

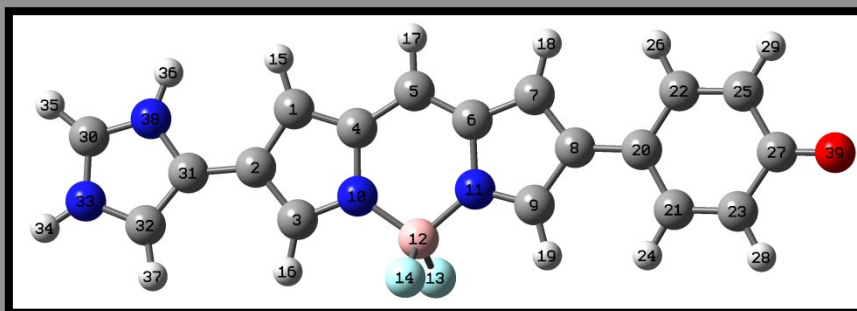

**Fig. S6** Optimized structure of compounds 2 in gas phase

**Table S6** Dihedral angles and bond angles of optimized structure of compound 2

| <b>Dihedral angles</b> |        |
|------------------------|--------|
| N38-C31-C2-C3          | -175.9 |
| C7-C8-C20-C21          | 178.9  |
| <b>Bond angles</b>     |        |
| N38-C31-C2             | 122.3  |
| C8-C20-C21             | 122.4  |

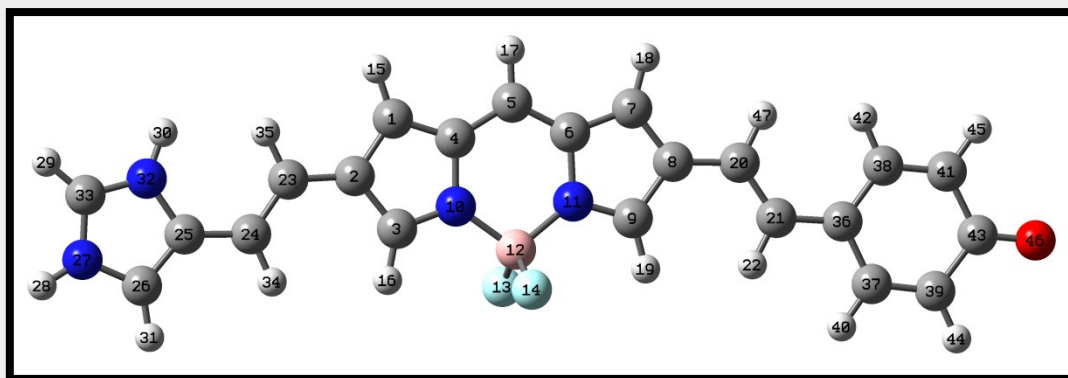

**Fig. S7** Optimized structure of compounds 2a in gas phase

**Table S7** Dihedral angles and bond angles of optimized structure of compound 2a

| <b>Dihedral angles</b> |       |
|------------------------|-------|
| C25-C24-C23-C2         | 179.9 |
| C8-C20-C21-C36         | -180  |
| <b>Bond angles</b>     |       |
| N32-C25-C24            | 125.3 |
| C21-C36-C37            | 119.3 |

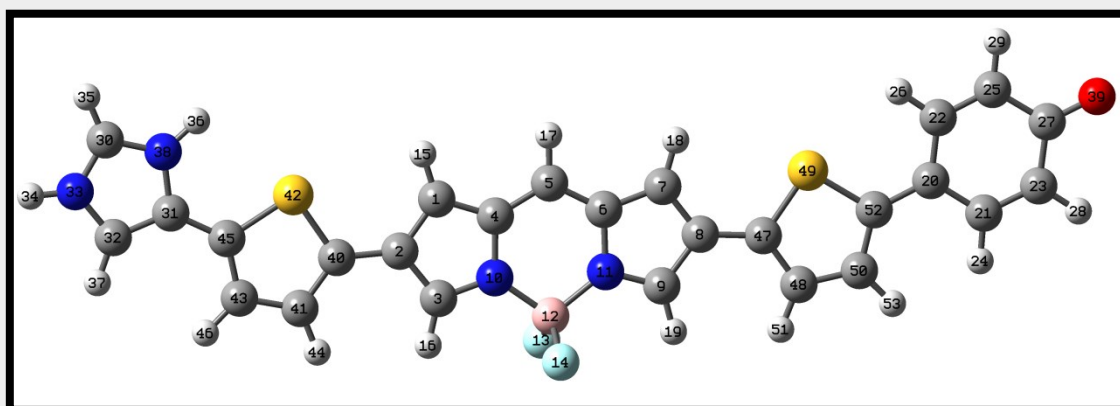

**Fig. S8** Optimized structure of compounds 2b in gas phase

**Table S8** Dihedral angles and bond angles of optimized structure of compound 2b

| <b>Dihedral angles</b> |        |
|------------------------|--------|
| N38-C31-C45-C43        | -179.9 |
| S42-C40-C2-C3          | 179.9  |
| S49-C47-C8-C9          | 179.9  |
| C22-C20-C52-C50        | 180    |
| <b>Bond angles</b>     |        |
| C31-C45-S42            | 121.8  |

|             |       |
|-------------|-------|
| S42-C40-C2  | 120.5 |
| C8-C47-S49  | 121.4 |
| S49-C52-C20 | 122.0 |

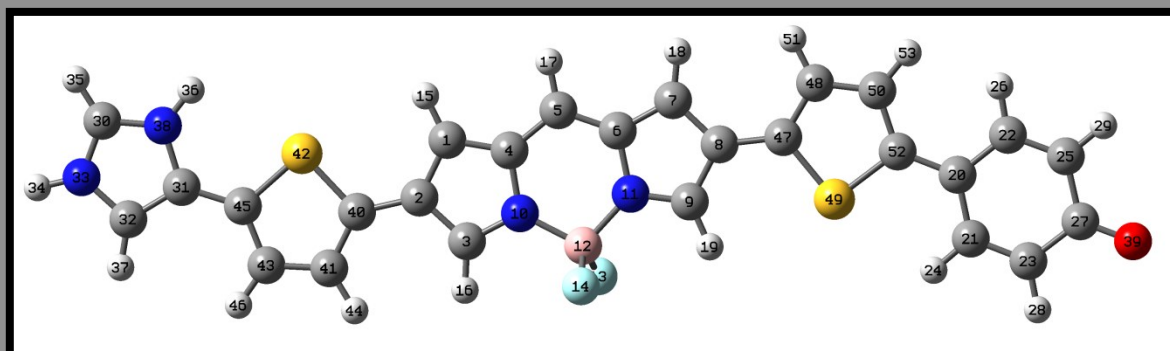

Fig. S9 Optimized structure of compounds 2c in gas phase

Table S9 Dihedral angles and bond angles of optimized structure of compound 2c

| Dihedral angles |       |
|-----------------|-------|
| S38-C31-C45-C43 | -180  |
| S42-C40-C2-C3   | 179.9 |
| C7-C8-C47-S49   | 179.9 |
| C50-C52-C20-C21 | 179.9 |
| Bond angles     |       |
| C31-C45-S42     | 121.8 |
| S42-C40-C2      | 120.5 |
| C8-C47-S49      | 122.8 |
| S49-C52-C20     | 122.3 |

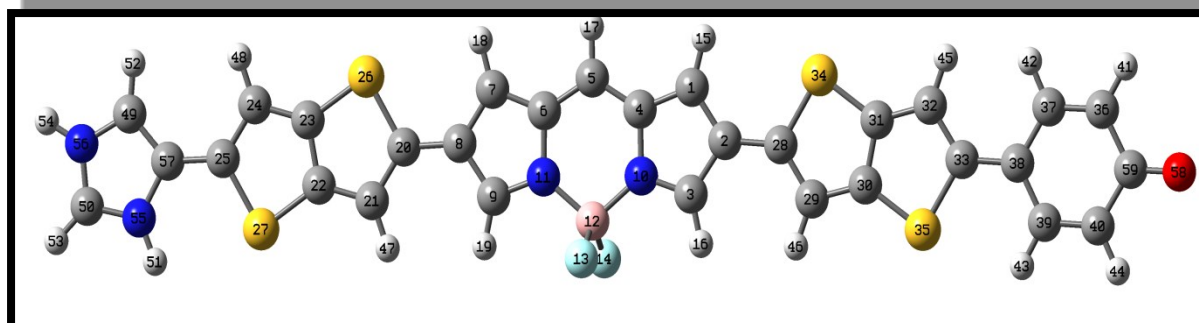

Fig. S10 Optimized structure of compounds 2d in gas phase

**Table S10** Dihedral angles and bond angles of optimized structure of compound 2d

| Dihedral angles |        |
|-----------------|--------|
| N55-C57-C25-C24 | -179.9 |
| S26-S20-C8-C9   | 179.9  |
| S34-C28-C2-C3   | -179.9 |
| S35-C33-C38-C37 | 180    |
| Bond angles     |        |
| C57-C25-S27     | 120.9  |
| S26-C20-C8      | 119.9  |
| C2-C28-S34      | 120.3  |
| S35-C33-C38     | 120.1  |

**Table S11** Main electronic transitions, maximum absorption wavelength ( $\lambda_{\max}$ ), oscillator strength( $f$ ) and transition nature of BODIPY based dyes in gas phase at B3LYP/6-311++G(d,p) level of theory.

| Dye       | Excited energy (eV) | $\lambda_{\max}$ (nm) | $f$    | Assignment            |       |
|-----------|---------------------|-----------------------|--------|-----------------------|-------|
| <b>1</b>  | 1.229               | 1008.17               | 0.4718 | H $\rightarrow$ L     | 0.587 |
|           | 1.057               | 1173.07               | 0.1907 | H $\rightarrow$ L+1   | 0.519 |
|           | 1.761               | 704.18                | 0.0282 | H $\rightarrow$ L+2   | 0.697 |
| <b>1a</b> | 1.1                 | 1126.71               | 0.7545 | H $\rightarrow$ L     | 0.397 |
|           | 1.264               | 980.96                | 0.4404 | H $\rightarrow$ L + 1 | 0.491 |
| <b>1b</b> | 0.953               | 1301.28               | 0.9164 | H $\rightarrow$ L     | 0.374 |
|           | 1.151               | 1076.74               | 0.4941 | H $\rightarrow$ L + 1 | 0.493 |
| <b>1c</b> | 0.807               | 1536.02               | 0.5670 | H $\rightarrow$ L     | 0.725 |
|           | 1.155               | 1073.14               | 0.7233 | H $\rightarrow$ L + 1 | 0.634 |
| <b>1d</b> | 0.735               | 1684.85               | 1.209  | H $\rightarrow$ L     | 0.351 |
|           | 1.046               | 1184.92               | 0.5106 | H $\rightarrow$ L + 1 | 0.509 |
| <b>2</b>  | 0.997               | 1243.53               | 0.1438 | H $\rightarrow$ L     | 0.513 |
|           | 1.322               | 938.02                | 0.3066 | H $\rightarrow$ L+1   | 0.447 |
| <b>2a</b> | 0.756               | 1639.72               | 0.1830 | H $\rightarrow$ L     | 0.665 |
|           | 1.229               | 1008.30               | 0.5580 | H $\rightarrow$ L+1   | 0.568 |



|           |       |         |        |         |       |
|-----------|-------|---------|--------|---------|-------|
| <b>2b</b> | 0.729 | 1701.23 | 0.1683 | H → L   | 0.452 |
|           | 1.021 | 1213.96 | 0.5388 | H → L+1 | 0.272 |
| <b>2c</b> | 0.700 | 1770.09 | 0.1651 | H → L   | 0.524 |
|           | 0.969 | 1279.28 | 0.7996 | H → L+1 | 0.581 |
| <b>2d</b> | 0.653 | 1897.67 | 0.2899 | H → L   | 0.575 |
|           | 0.850 | 1458    | 0.5713 | H → L+1 | 0.458 |

**Table S12** Static polarizability, first hyperpolarizability of the studied dyes at the CAM-B3LYP/6-311++G(d,p) level of theory.

| <b>Molecules</b> | $\Delta\alpha$<br>$10^{-24}$ esu | $\beta_{\text{total}}$<br>$10^{-30}$ esu |
|------------------|----------------------------------|------------------------------------------|
| 1                | 107.13                           | 462.05                                   |
| 1a               | 176.87                           | 2212.40                                  |
| 1b               | 267.10                           | 4258.66                                  |
| 1c               | 268.44                           | 5157.16                                  |
| 1d               | 430.23                           | 7413.08                                  |
| 2                | 77.19                            | 1023.04                                  |
| 2a               | 129.89                           | 1967.89                                  |
| 2b               | 190.94                           | 4572.24                                  |
| 2c               | 200.71                           | 5492.05                                  |
| 2d               | 301.62                           | 14,231.26                                |

**Table S13**  $\beta_x$ ,  $\beta_y$ , and  $\beta_z$  components ( $10^{-30}$  esu) of studied molecules (1 to 2d) obtained from DFT calculation (CAM-B3LYP functional), employing the 6-311++G(d,p) basis set.

| <b>Molecul<br/>es</b> | $\beta_x$ | $\beta_y$ | $\beta_z$ |
|-----------------------|-----------|-----------|-----------|
| 1                     | 2.93      | 32.82     | 460.88    |
| 1a                    | 1.79      | 347.97    | 2184.79   |
| 1b                    | -9.99     | 281.70    | 4249.32   |
| 1c                    | 93.3      | -703.09   | 5108.17   |
| 1d                    | -48.4     | 798.11    | 7639.83   |
| 2                     | -6.72     | 152.02    | 1011.66   |
| 2a                    | 33.0      | -113.76   | 1963.70   |
| 2b                    | 21.2      | 275.39    | 4563.89   |
| 2c                    | 0.72      | 203.38    | 5488.59   |
| 2d                    | -21.1     | -729.59   | 14212.53  |

**Table S14** Benchmarking of hyperpolarizability.

| Molecule                                 | Solvent | Experiment<br>$\beta_{total}$<br>( $10^{-30}$ esu) | Theoretical<br>$\beta_{total}$ ( $10^{-30}$ esu) |                             |
|------------------------------------------|---------|----------------------------------------------------|--------------------------------------------------|-----------------------------|
|                                          |         |                                                    | B3LYP<br>/6-311++g(d,p)                          | CAM-B3LYP/<br>6-311++G(d,p) |
| P-Nitroaniline                           | benzene | 34.5                                               | 28.82                                            | 14.78                       |
| Paradimethylamino- $\beta$ -nitrostyrene | Ethanol | $220 \pm 40$                                       | 196.55                                           | 162.46                      |
